# Supplementary material for: Acinetobacter baumannii from grass: novel but non-resistant clones
Source: PubMed Central journal article supplement (PMC10438806; doi:10.1099/mgen.0.001054), 2023-07-13
Supplement: mgen-9-1054-s001.pdf [file mgen-9-1054-s001.pdf]

## Supplementary File 1

### Bacterial isolation and identification of isolates

Grass and manure samples were analysed for the presence of *A. baumannii*. Each grass sample (100 g) was placed into a sterile 500 ml centrifuge bottle containing 250 ml of sterile phosphate buffered saline (PBS) (Gibco). The grass samples were then sonicated for 5 minutes to isolate the grass microbial biofilm. The manure (1 g) was added to nutrient broth and incubated at 37°C for 24 hours. The grass sonicates and manure enrichment samples then underwent tenfold serial dilutions in sterile PBS. For each sample, 100 µl was used to inoculate Leeds Acinetobacter Media agar supplemented with each respective antibiotic at breakpoint concentrations: imipenem (16 mg/L), cefotaxime (4 mg/L), colistin (4 mg/L) and ciprofloxacin (1 mg/L) for the isolation of *Acinetobacter* spp.<sup>13</sup> Agar plates were incubated at 37°C for 24 - 48 hours. Bacterial colony material of pure cultures was transferred by direct smearing in duplicate onto spots of the MALDI-TOF mass spectrometry (MS) target (MTP ground steel, Bruker Daltonics) with toothpicks. To the dried spots, 1 µL matrix solution (10 mg α-cyano-4-hydroxycinnamic acid, Bruker Daltonics) dissolved in 1 mL acetonitrile-water-trifluoroacetic acid (50:47.5:2.5 (vol/vol/vol), Sigma-Aldrich) was added, and this solution was air-dried. Sample spectra were acquired using a microflex LT MALDI-TOF mass spectrometer (Bruker Daltonics) and the flexControl software (ver. 3.4; Bruker Daltonics). Spectra were classified using the Bruker Taxonomy main spectra database (MBT Compass ver. 4.1. with 8468 spectra present, Bruker Daltonics). Bacterial identification was reported to the species level if the score value was above 2.00 or to the genus level if the score was between 1.70 and 1.99. Any isolates that were not successfully identified using MALDI-TOF MS were identified using 16S rRNA colony PCR and sequencing. To prepare bacterial isolates for PCR, a single colony was suspended in 50 µl double-filtered Milli-Q water in a sterile 0.25 ml PCR tube. The colony suspension was then boiled in a Thermocycler (Eppendorf Mastercycler gradient) at 95°C for 10 minutes. A 1465 bp fragment of the 16S rRNA gene was amplified by PCR by targeting nucleotides 27 to 1492 of the 16S rRNA gene. The fragment was amplified using the primer set 27F (5'-AGAGTTTGATCCTGGCTCAG-3') and 1492R (5'-TACGGYTACCTTGTTACGACTT-3'). Sequences with ≥ 97% identity were accepted at genus level and samples with ≥ 99% identity were accepted at the species level.

**Supplementary Table 1:** Table displaying sampling time points completed during the field trial.

| <u>Timepoint</u> | <u>Timepoint Description</u>                                                      | <u>Date Sampled</u> |
|------------------|-----------------------------------------------------------------------------------|---------------------|
| Background (BM)  | Samples taken the day of manure spreading before any manure applied to the field. | 25/06/19            |
| T0               | Immediately after manure spreading                                                | 25/06/19            |
| T1               | 1 week following manure spreading                                                 | 02/07/19            |
| T2               | 2 weeks following manure spreading                                                | 10/07/19            |
| T3               | 3 weeks following manure spreading                                                | 16/07/19            |
| T4               | 4 weeks following manure spreading                                                | 22/07/19            |
| T5               | 5 weeks following manure spreading                                                | 29/07/19            |
| T6               | 6 weeks following manure spreading                                                | 06/08/19            |
| T7               | 10 weeks following manure spreading                                               | 02/09/19            |
| T8               | 14 weeks following manure spreading                                               | 02/10/19            |
| T9               | 18 weeks following manure spreading                                               | 30/10/19            |

Supplementary Table 2

List of all the isolates employed in this study. The isolation date and source are listed. Also, genome assembly statistics and ST assignment are provided for each isolate; blue denotes new STs

| Strain            | Biosample    | Isolation date | Isolation source                      | N_contigs | N50     | L50 | %GC   | Size    | N_genes | Completeness | Contaminant | ANI vs ref | Oxford ST        | Pasteur ST  |
|-------------------|--------------|----------------|---------------------------------------|-----------|---------|-----|-------|---------|---------|--------------|-------------|------------|------------------|-------------|
| GS T1 EMB CEF 4   | SAMN31927120 | 7/2/19         | Grass with Pig Manure                 | 18        | 728794  | 2   | 38.63 | 3849335 | 3694    | 100          | 0           | 97.97961   | <b>2889</b>      | <b>2327</b> |
| GP T1 LAM CEF 4   | SAMN31927121 | 7/2/19         | Grass with Chicken Manure             | 17        | 909758  | 2   | 38.97 | 3907143 | 3646    | 100          | 0.41        | 97.94763   | <b>2887</b>      | 462         |
| GC T1 LAM CEF 6   | SAMN31927122 | 7/2/19         | Control Grass (No Manure)             | 19        | 909758  | 2   | 38.97 | 3907592 | 3645    | 100          | 0.41        | 97.94717   | <b>2887</b>      | 462         |
| GP T3 SC CEF 1    | SAMN31927123 | 7/16/19        | Grass with Chicken Manure             | 19        | 909758  | 2   | 38.97 | 3907592 | 3645    | 100          | 0.41        | 97.94168   | <b>2887</b>      | 462         |
| GC T1 SC CEF 1    | SAMN31927124 | 7/2/19         | Control Grass (No Manure)             | 22        | 448651  | 4   | 38.6  | 3970964 | 3788    | 100          | 0           | 97.94913   | <b>2892</b>      | <b>2317</b> |
| G2 BM SC CEF 6    | SAMN31927125 | 6/25/19        | Background Grass (no manure on field) | 17        | 909758  | 2   | 38.97 | 3907143 | 3645    | 100          | 0.41        | 97.94538   | <b>2887</b>      | 462         |
| GP T1 EMB CEF 1   | SAMN31927126 | 7/2/19         | Grass with Chicken Manure             | 17        | 2156011 | 1   | 38.63 | 3849381 | 3693    | 100          | 0           | 97.98184   | <b>2889</b>      | <b>2327</b> |
| GP T1 EMB CEF 6   | SAMN31927127 | 7/2/19         | Grass with Chicken Manure             | 19        | 373660  | 3   | 38.63 | 3849021 | 3694    | 100          | 0           | 97.97971   | <b>2889</b>      | <b>2327</b> |
| GC T1 LAM CEF 4   | SAMN31927128 | 7/2/19         | Control Grass (No Manure)             | 16        | 2156011 | 1   | 38.63 | 3848722 | 3693    | 100          | 0           | 97.98181   | <b>2889</b>      | <b>2327</b> |
| G2 BM LAM CEF 5   | SAMN31927129 | 6/25/19        | Background Grass (no manure on field) | 29        | 386749  | 4   | 39.02 | 3821903 | 3633    | 100          | 0           | 97.91593   | <b>2893</b>      | 2118        |
| G2 BM SC CEF 3    | SAMN31927130 | 6/25/19        | Background Grass (no manure on field) | 19        | 909593  | 2   | 38.97 | 3907427 | 3647    | 100          | 0.41        | 97.9416    | <b>2887</b>      | 462         |
| GP T1 EMB CEF 4   | SAMN31927131 | 7/2/19         | Grass with Chicken Manure             | 17        | 2156011 | 1   | 38.63 | 3849494 | 3694    | 100          | 0           | 97.9808    | <b>2889</b>      | <b>2327</b> |
| G2 BM LAM CEF 4   | SAMN31927132 | 6/25/19        | Background Grass (no manure on field) | 22        | 530972  | 2   | 38.78 | 4040395 | 3815    | 100          | 0           | 97.92196   | <b>2890/2891</b> | 44          |
| G2 BM SC CEF 5    | SAMN31927133 | 6/25/19        | Background Grass (no manure on field) | 17        | 909758  | 2   | 38.97 | 3907143 | 3647    | 100          | 0.41        | 97.94201   | <b>2887</b>      | 462         |
| GP T1 SC CEF 4    | SAMN31927134 | 7/2/19         | Grass with Chicken Manure             | 54        | 250849  | 6   | 38.81 | 4114740 | 4001    | 100          | 0.41        | 97.91929   | <b>2888</b>      | 1027        |
| G2 BM LAM CEF 2   | SAMN31927135 | 6/25/19        | Background Grass (no manure on field) | 16        | 2156011 | 1   | 38.63 | 3849430 | 3693    | 100          | 0           | 97.98134   | <b>2889</b>      | <b>2327</b> |
| GP T1 LAM CEF 2   | SAMN31927136 | 7/2/19         | Grass with Chicken Manure             | 52        | 250766  | 6   | 38.8  | 4114536 | 4000    | 100          | 0.41        | 97.92329   | <b>2888</b>      | 1027        |
| GP T1 LAM CEF 5   | SAMN31927137 | 7/2/19         | Grass with Chicken Manure             | 19        | 909776  | 2   | 38.97 | 3907610 | 3646    | 100          | 0.41        | 97.94506   | <b>2887</b>      | 462         |
| GP T1 LAM CEF 3   | SAMN31927138 | 7/2/19         | Grass with Chicken Manure             | 53        | 250849  | 6   | 38.81 | 4114756 | 4001    | 100          | 0.41        | 97.92289   | <b>2888</b>      | 1027        |
| GC T1 LAM CEF 2   | SAMN31927139 | 7/2/19         | Control Grass (No Manure)             | 19        | 909758  | 2   | 38.97 | 3907592 | 3646    | 100          | 0.41        | 97.94156   | <b>2887</b>      | 462         |
| GS T1 EMB CEF 6   | SAMN31927140 | 7/2/19         | Grass with Pig Manure                 | 21        | 530972  | 2   | 38.78 | 4040268 | 3815    | 100          | 0           | 97.93439   | <b>2890/2891</b> | 44          |
| GP T1 LAM CEF 1   | SAMN31927141 | 7/2/19         | Grass with Chicken Manure             | 19        | 909758  | 2   | 38.97 | 3907592 | 3645    | 100          | 0.41        | 97.9471    | <b>2887</b>      | 462         |
| GS T1 EMB CEF 2   | SAMN31927142 | 7/2/19         | Grass with Pig Manure                 | 22        | 530972  | 2   | 38.78 | 4040795 | 3816    | 100          | 0           | 97.92168   | <b>2890/2891</b> | 44          |
| GP T1 SC CEF 3    | SAMN31927143 | 7/2/19         | Grass with Chicken Manure             | 53        | 250849  | 6   | 38.81 | 4115092 | 4002    | 100          | 0.41        | 97.92346   | <b>2888</b>      | 1027        |
| GC T1 EMB CEF 3   | SAMN31927144 | 7/2/19         | Control Grass (No Manure)             | 19        | 909758  | 2   | 38.97 | 3907592 | 3648    | 100          | 0.41        | 97.94714   | <b>2887</b>      | 462         |
| GC T1 EMB CEF 2   | SAMN31927145 | 7/2/19         | Control Grass (No Manure)             | 17        | 1947779 | 1   | 38.63 | 3848629 | 3693    | 100          | 0           | 97.98187   | <b>2889</b>      | <b>2327</b> |
| GB T3 LAM CEF 2   | SAMN31927146 | 7/16/19        | Grass with Cow Manure                 | 23        | 530744  | 2   | 38.78 | 4041317 | 3815    | 100          | 0           | 97.934     | <b>2890/2891</b> | 44          |
| GB T3 LAM CEF 6   | SAMN31927147 | 7/16/19        | Grass with Cow Manure                 | 23        | 530729  | 2   | 38.78 | 4040922 | 3815    | 100          | 0           | 97.9341    | <b>2890/2891</b> | 44          |
| GB T3 EMB CEF 1   | SAMN31927148 | 7/16/19        | Grass with Cow Manure                 | 28        | 386749  | 4   | 39.02 | 3822855 | 3632    | 100          | 0           | 97.91587   | <b>2893</b>      | 2118        |
| GB T3 LAM CEF 5   | SAMN31927149 | 7/16/19        | Grass with Cow Manure                 | 22        | 530744  | 2   | 38.78 | 4040795 | 3815    | 100          | 0           | 97.9341    | <b>2890/2891</b> | 44          |
| GP T3 EMB COL 1   | SAMN31927150 | 7/16/19        | Grass with Chicken Manure             | 43        | 257008  | 5   | 38.98 | 3851368 | 3638    | 100          | 0           | 97.86246   | 1208             | 584         |
| GB T3 LAM CEF 1   | SAMN31927151 | 7/16/19        | Grass with Cow Manure                 | 22        | 530972  | 2   | 38.78 | 4041303 | 3816    | 100          | 0           | 97.93335   | <b>2890/2891</b> | 44          |
| GP T3 LAM CEF 4   | SAMN31927152 | 7/16/19        | Grass with Chicken Manure             | 15        | 2156011 | 1   | 38.63 | 3849647 | 3693    | 100          | 0           | 97.97917   | <b>2889</b>      | <b>2327</b> |
| GB T3 EMB CEF 2   | SAMN31927153 | 7/16/19        | Grass with Cow Manure                 | 26        | 386749  | 4   | 39.02 | 3821965 | 3631    | 100          | 0           | 97.91772   | <b>2893</b>      | 2118        |
| GB T3 LAM CIPRO 4 | SAMN31927154 | 7/16/19        | Grass with Cow Manure                 | 42        | 257008  | 5   | 38.97 | 3850304 | 3638    | 100          | 0           | 97.86288   | 1208             | 584         |
| GB T3 LAM COL 1   | SAMN31927155 | 7/16/19        | Grass with Cow Manure                 | 20        | 530729  | 2   | 38.78 | 4040370 | 3815    | 100          | 0           | 97.93418   | <b>2890/2891</b> | 44          |
| GP T3 LAM CEF 3   | SAMN31927156 | 7/16/19        | Grass with Chicken Manure             | 27        | 386749  | 4   | 39.02 | 3822623 | 3632    | 100          | 0           | 97.91484   | <b>2893</b>      | 2118        |
| GC T1 EMB CEF 1   | SAMN31927157 | 7/2/19         | Control Grass (No Manure)             | 24        | 530729  | 2   | 38.78 | 4041444 | 3815    | 100          | 0           | 97.92168   | <b>2890/2891</b> | 44          |
| GB T1 SC CEF 1    | SAMN31927158 | 7/2/19         | Grass with Cow Manure                 | 24        | 464653  | 3   | 38.99 | 3787902 | 3574    | 100          | 0.14        | 97.96892   | 1775             | 1190        |
| GC T1 SC CEF 4    | SAMN31927159 | 7/2/19         | Control Grass (No Manure)             | 51        | 250849  | 6   | 38.8  | 4114754 | 4001    | 100          | 0.41        | 97.92349   | <b>2888</b>      | 1027        |
| GP T1 EMB CEF 3   | SAMN31927160 | 7/2/19         | Grass with Chicken Manure             | 15        | 2156011 | 1   | 38.63 | 3848803 | 3693    | 100          | 0           | 97.98179   | <b>2889</b>      | <b>2327</b> |
| GP T3 LAM CEF 1   | SAMN31927161 | 7/16/19        | Grass with Chicken Manure             | 26        | 386749  | 4   | 39.02 | 3822117 | 3631    | 100          | 0           | 97.91491   | <b>2893</b>      | 2118        |
| GP T3 LAM CEF 2   | SAMN31927162 | 7/16/19        | Grass with Chicken Manure             | 18        | 728794  | 2   | 38.63 | 3848963 | 3695    | 100          | 0           | 97.9808    | <b>2889</b>      | <b>2327</b> |
| GP T1 EMB CEF 5   | SAMN31927163 | 7/2/19         | Grass with Chicken Manure             | 19        | 373660  | 3   | 38.63 | 3849021 | 3694    | 100          | 0           | 97.98182   | <b>2889</b>      | <b>2327</b> |
| GC T1 LAM CEF 1   | SAMN31927164 | 7/2/19         | Control Grass (No Manure)             | 22        | 448651  | 4   | 38.6  | 3971541 | 3789    | 100          | 0           | 97.94913   | <b>2892</b>      | <b>2317</b> |
| GS T1 EMB CEF 5   | SAMN31927165 | 7/2/19         | Grass with Pig Manure                 | 28        | 386749  | 4   | 39.02 | 3822818 | 3633    | 100          | 0           | 97.91604   | <b>2893</b>      | 2118        |
| GC T1 SC CEF 3    | SAMN31927166 | 7/2/19         | Control Grass (No Manure)             | 52        | 250766  | 6   | 38.8  | 4113841 | 4000    | 100          | 0.41        | 97.92308   | <b>2888</b>      | 1027        |
| GC T1 SC CEF 2    | SAMN31927167 | 7/2/19         | Control Grass (No Manure)             | 20        | 448651  | 3   | 38.6  | 3972463 | 3788    | 100          | 0           | 97.94882   | <b>2892</b>      | <b>2317</b> |
| G2 BM LAM CEF 1   | SAMN31927168 | 6/25/19        | Background Grass (no manure on field) | 19        | 530972  | 2   | 38.78 | 4041804 | 3816    | 100          | 0           | 97.92164   | <b>2890/2891</b> | 44          |
| GC T1 LAM CEF 3   | SAMN31927169 | 7/2/19         | Control Grass (No Manure)             | 20        | 530972  | 2   | 38.78 | 4042033 | 3816    | 100          | 0           | 97.93435   | <b>2890/2891</b> | 44          |
| GC T1 LAM CEF 5   | SAMN31927170 | 7/2/19         | Control Grass (No Manure)             | 18        | 909593  | 2   | 38.97 | 3907226 | 3647    | 100          | 0.41        | 97.94451   | <b>2887</b>      | 462         |
| GP T1 EMB CEF 2   | SAMN31927171 | 7/2/19         | Grass with Chicken Manure             | 17        | 2156011 | 1   | 38.63 | 3849293 | 3694    | 100          | 0           | 97.98181   | <b>2889</b>      | <b>2327</b> |
| GS T1 EMB CEF 1   | SAMN31927172 | 7/2/19         | Grass with Pig Manure                 | 28        | 386749  | 4   | 39.02 | 3822818 | 3632    | 100          | 0           | 97.91488   | <b>2893</b>      | 2118        |
| G2 EMB CEF 7      | SAMN31927173 | 6/25/19        | Background Grass (no manure on field) | 27        | 386749  | 4   | 39.02 | 3822364 | 3633    | 100          | 0           | 97.91486   | <b>2893</b>      | 2118        |
| G2 EMB CEF 6      | SAMN31927174 | 6/25/19        | Background Grass (no manure on field) | 15        | 2156011 | 1   | 38.63 | 3849511 | 3693    | 100          | 0           | 97.97922   | <b>2889</b>      | <b>2327</b> |
| GP T3 LAM COL 3   | SAMN31927175 | 7/16/19        | Grass with Chicken Manure             | 19        | 530972  | 2   | 38.77 | 4039195 | 3815    | 100          | 0           | 97.92182   | <b>2890/2891</b> | 44          |
| GC T1 EMB CEF 4   | SAMN31927176 | 7/2/19         | Control Grass (No Manure)             | 17        | 2156011 | 1   | 38.63 | 3849381 | 3693    | 100          | 0           | 97.98181   | <b>2889</b>      | <b>2327</b> |
| G2 BM LAM CEF 3   | SAMN31927177 | 6/25/19        | Background Grass (no manure on field) | 21        | 530744  | 2   | 38.78 | 4040268 | 3814    | 100          | 0           | 97.93439   | <b>2890/2891</b> | 44          |
| GC T3 SC CEF 1    | SAMN31927178 | 7/16/19        | Control Grass (No Manure)             | 23        | 530729  | 2   | 38.78 | 4041054 | 3815    | 100          | 0           | 97.92164   | <b>2890/2891</b> | 44          |
| GP T3 LAM COL 2   | SAMN31927179 | 7/16/19        | Grass with Chicken Manure             | 22        | 530744  | 2   | 38.78 | 4040464 | 3814    | 100          | 0           | 97.92168   | <b>2890/2891</b> | 44          |
| GP T1 LAM CEF 6   | SAMN31927180 | 7/2/19         | Grass with Chicken Manure             | 52        | 250766  | 6   | 38.81 | 4115435 | 4002    | 100          | 0.41        | 97.91923   | <b>2888</b>      | 1027        |

**Supplementary Table 3**

Extra genomes were used for the analysis. For all the genomes the BioSample numbers are provided. Regarding the human isolates, their ICs are provided. Animal isolates are highlighted in yellow

| Biosample      | Iso_source    | Category      | Host         | Strain          | Isolation date | Geographic location | Isolation source      | IC | Pasteur | Oxford | Completeness | Contaminatio |
|----------------|---------------|---------------|--------------|-----------------|----------------|---------------------|-----------------------|----|---------|--------|--------------|--------------|
| SAMN07303764   | human-related | human-related | Homo sapiens | IHSS3526        | 2016           | Honduras            | endobronchial tube    | 1  | 1       | 1590   | 100          | 0            |
| SAMN03078680   | human-related | human-related | Homo sapiens | AB4991          | 2008           | USA                 | warwound              | 1  | 1       | 207    | 100          | 0            |
| SAMEA1466008   | human-related | human-related | Homo sapiens | A388            | 2002           | Greece              | missing               | 1  | 1       | 439    | 100          | 0            |
| SAMEA1317920   | human-related | human-related | Homo sapiens | D81             | 2010           | Australia           | wound                 | 1  | 1       | 441    | 100          | 0            |
| SAMN02628532   | human-related | human-related | Homo sapiens | R1B             | 2011           | Saudi Arabia        | missing               | 1  | 1       | 441    | 99.91        | 0            |
| SAMEA1317927   | human-related | human-related | Homo sapiens | RBH3            | 2002           | Australia           | endotracheal aspirate | 1  | 1       | 781    | 100          | 0            |
| SAMEA1465988   | human-related | human-related | Homo sapiens | 6772166         | 2002           | Australia           | pus                   | 1  | 1       | 781    | 100          | 0            |
| SAMN03078672   | human-related | human-related | Homo sapiens | AB4448          | 2007           | USA                 | warwound              | 1  | 1       | 945    | 100          | 0.14         |
| SAMN03078683   | human-related | human-related | Homo sapiens | AB5674          | 2009           | USA                 | blood                 | 1  | 1       | 945    | 100          | 0            |
| SAMEA1317930   | human-related | human-related | Homo sapiens | D3208           | 1997           | Australia           | blood                 | 1  | 1       | 231    | 100          | 0            |
| SAMEA1709749   | human-related | human-related | Homo sapiens | A297            | 1984           | Netherlands         | missing               | 1  | 1       | 231    | 99.73        | 0.14         |
| SAMN01828143   | human-related | human-related | Homo sapiens | NIPH 290        | 1994           | Czech Republic      | urine                 | 1  | 1       | 231    | 100          | 0            |
| SAMN03078682   | human-related | human-related | Homo sapiens | AB5197          | 2008           | USA                 | severe trauma site    | 1  | 1       | 231    | 100          | 0.14         |
| SAMN04407353   | human-related | human-related | Homo sapiens | MEX11594        | 2011           | Mexico              | pleural fluid         | 1  | 1       | 231    | 100          | 0            |
| SAMN05292963   | human-related | human-related | Homo sapiens | IHIT25424       | 2011           | Germany             | missing               | 1  | 1       | 231    | 100          | 1.01         |
| SAMN07257378   | human-related | human-related | Homo sapiens | 13              | 2012           | Brazil              | tracheal aspirate     | 1  | 1       | 231    | 100          | 0            |
| SAMN07534975   | human-related | human-related | Homo sapiens | 237             | 2016           | Togo                | cerebrospinal fluid   | 1  | 1       | 231    | 99.22        | 1.64         |
| SAMN03078661   | human-related | human-related | Homo sapiens | AB3340          | 2006           | USA                 | blood                 | 1  | 20      | 449    | 100          | 0            |
| SAMN05590239   | human-related | human-related | Homo sapiens | 071             | 2010           | Spain               | blood                 | 1  | 81      | 1868   | 100          | 0            |
| SAMN03078666   | human-related | human-related | Homo sapiens | AB3927          | 2007           | USA                 | severe trauma site    | 1  | 717     | 441    | 100          | 0            |
| SAMN08093362   | human-related | human-related | Homo sapiens | ZQ3             | 2016           | Iraq                | blood                 | 1  | 717     | 498    | 100          | 0.62         |
| SAMN08043814   | human-related | human-related | Homo sapiens | ZQ1             | 2016           | Iraq                | wound swab            | 2  | 2       | 1052   | 99.19        | 0.63         |
| SAMN08619566   | human-related | human-related | Homo sapiens | AB1             | 2012           | China               | blood                 | 2  | 2       | 136    | 99.59        | 0.63         |
| SAMN10618172   | human-related | human-related | Homo sapiens | O1-3            | 2018           | China               | sputum                | 2  | 2       | 136    | 99.98        | 0.7          |
| SAMN05292964   | human-related | human-related | Homo sapiens | IHIT29106       | 2014           | Germany             | missing               | 2  | 2       | 1421   | 99.98        | 1.2          |
| SAMEA104305272 | human-related | human-related | Homo sapiens | 4300STDY7045777 | 2016           | Thailand            | missing               | 2  | 2       | 1423   | 99.85        | 0.63         |
| SAMN03068194   | human-related | human-related | Homo sapiens | 2004BJAB10      | 2004           | China               | sputum                | 2  | 2       | 1513   | 99.98        | 0.62         |
| SAMN08619592   | human-related | human-related | Homo sapiens | AB27            | 2014           | China               | blood                 | 2  | 2       | 1633   | 99.98        | 0.63         |
| SAMEA104305260 | human-related | human-related | Homo sapiens | 4300STDY7045764 | 2016           | Thailand            | missing               | 2  | 2       | 1634   | 99.98        | 0.78         |
| SAMN10716699   | human-related | human-related | Homo sapiens | RCS4            | 2017           | France              | throat sample         | 2  | 2       | 1634   | 99.98        | 0.63         |
| SAMEA104305201 | human-related | human-related | Homo sapiens | 4300STDY7045705 | 2016           | Thailand            | missing               | 2  | 2       | 1684   | 99.98        | 0.63         |
| SAMEA104305197 | human-related | human-related | Homo sapiens | 4300STDY7045701 | 2016           | Thailand            | missing               | 2  | 2       | 1890   | 99.98        | 0.63         |
| SAMEA104305199 | human-related | human-related | Homo sapiens | 4300STDY7045703 | 2016           | Thailand            | missing               | 2  | 2       | 1933   | 99.98        | 0.63         |
| SAMN04054373   | human-related | human-related | Homo sapiens | A186            | missing        | South Africa        | missing               | 2  | 2       | 204    | 99.59        | 0.61         |
| SAMN10101945   | human-related | human-related | Homo sapiens | 14A771          | 2014           | France              | respiratory sample    | 2  | 2       | 348    | 99.59        | 0.63         |
| SAMN10101946   | human-related | human-related | Homo sapiens | 15A831          | 2015           | France              | respiratory sample    | 2  | 2       | 348    | 99.59        | 0.63         |
| SAMEA104305264 | human-related | human-related | Homo sapiens | 4300STDY7045768 | 2016           | Thailand            | missing               | 2  | 2       | 349    | 99.98        | 0.77         |
| SAMN01828145   | human-related | human-related | Homo sapiens | NIPH 528        | 1982           | Netherlands         | urine                 | 2  | 2       | 350    | 99.98        | 0.61         |
| SAMN03068195   | human-related | human-related | Homo sapiens | 1999BJAB11      | 1999           | China               | sputum                | 2  | 2       | 350    | 99.92        | 0.81         |
| SAMN04054216   | human-related | human-related | Homo sapiens | Ab Crete        | 2011           | United Kingdom      | sputum                | 2  | 2       | 350    | 99.98        | 0.61         |
| SAMN06106563   | human-related | human-related | Homo sapiens | Ab158 GEIH-2000 | 2000           | Spain               | missing               | 2  | 2       | 350    | 98.63        | 0.56         |
| SAMN08554707   | human-related | human-related | Homo sapiens | 6009-2          | 2010           | Portugal            | clinical specimen     | 2  | 2       | 350    | 99.44        | 0.64         |
| SAMN09095539   | human-related | human-related | Homo sapiens | ABAY10007       | 2010           | South Korea         | blood                 | 2  | 2       | 357    | 99.56        | 0.61         |
| SAMN09095540   | human-related | human-related | Homo sapiens | ABAY11001       | 2011           | South Korea         | blood                 | 2  | 2       | 357    | 99.56        | 0.71         |
| SAMN03068191   | human-related | human-related | Homo sapiens | 2011BJAB7       | 2011           | China               | sputum                | 2  | 2       | 369    | 99.98        | 0.96         |
| SAMN09095583   | human-related | human-related | Homo sapiens | ABAY13010       | 2013           | South Korea         | blood                 | 2  | 2       | 369    | 99.59        | 0.61         |
| SAMEA104305187 | human-related | human-related | Homo sapiens | 4300STDY7045691 | 2016           | Thailand            | missing               | 2  | 2       | 436    | 99.98        | 0.65         |
| SAMN13066395   | human-related | human-related | Homo sapiens | KT 2015 40      | 2015           | Greece              | bronchial             | 2  | 2       | 436    | 99.98        | 0.65         |
| SAMN03078670   | human-related | human-related | Homo sapiens | AB4052          | 2007           | USA                 | warwound              | 2  | 2       | 452    | 99.59        | 1.57         |

|                |               |               |              |                  |      |                |                           |   |     |     |       |      |
|----------------|---------------|---------------|--------------|------------------|------|----------------|---------------------------|---|-----|-----|-------|------|
| SAMN03078678   | human-related | human-related | Homo sapiens | AB4932           | 2008 | USA            | sputum                    | 2 | 2   | 452 | 99.59 | 0.61 |
| SAMN03765515   | human-related | human-related | Homo sapiens | MDRAB16          | 2010 | Taiwan         | blood                     | 2 | 2   | 455 | 99.32 | 0.7  |
| SAMN03765513   | human-related | human-related | Homo sapiens | KSPU17           | 2013 | Taiwan         | sputum                    | 2 | 2   | 455 | 99.59 | 1.03 |
| SAMEA104305357 | human-related | human-related | Homo sapiens | 4300STDY7045862  | 2016 | Thailand       | missing                   | 2 | 2   | 493 | 99.98 | 0.63 |
| SAMN04745538   | human-related | human-related | Homo sapiens | XH819            | 2014 | China          | sputum                    | 2 | 2   | 540 | 99.59 | 1.57 |
| SAMN08619575   | human-related | human-related | Homo sapiens | AB10             | 2013 | China          | blood                     | 2 | 2   | 540 | 99.98 | 0.61 |
| SAMN03765517   | human-related | human-related | Homo sapiens | MDRAB41          | 2009 | Taiwan         | blood                     | 2 | 2   | 544 | 99.98 | 0.23 |
| SAMN03765519   | human-related | human-related | Homo sapiens | MDRAB58          | 2009 | Taiwan         | blood                     | 2 | 2   | 545 | 99.98 | 0.63 |
| SAMN04745395   | human-related | human-related | Homo sapiens | XH515            | 2014 | China          | sputum                    | 2 | 2   | 547 | 99.59 | 0.63 |
| SAMN04745426   | human-related | human-related | Homo sapiens | XH665            | 2015 | China          | sputum                    | 2 | 2   | 547 | 99.98 | 0.63 |
| SAMN08619569   | human-related | human-related | Homo sapiens | AB4              | 2015 | China          | blood                     | 2 | 2   | 548 | 99.98 | 0.63 |
| SAMN01087912   | human-related | human-related | Homo sapiens | NIPH 24          | 1991 | Czech Republic | urine                     | 2 | 2   | 556 | 99.98 | 0.61 |
| SAMN07268441   | human-related | human-related | Homo sapiens | Ab 12            | 2013 | Ivory Coast    | urine                     | 2 | 2   | 556 | 98.24 | 1.13 |
| SAMN03068266   | human-related | human-related | Homo sapiens | 2011ZJAB1        | 2011 | China          | sputum                    | 2 | 2   | 643 | 99.98 | 0.61 |
| SAMN05730164   | human-related | human-related | Homo sapiens | ZJ06-200P5-1     | 2012 | China          | missing                   | 2 | 2   | 643 | 99.59 | 0.67 |
| SAMN03068267   | human-related | human-related | Homo sapiens | 2011ZJAB2        | 2011 | China          | abdominal fluid           | 2 | 2   | 651 | 99.59 | 0.61 |
| SAMN03078667   | human-related | human-related | Homo sapiens | AB4025           | 2007 | USA            | wound                     | 2 | 2   | 848 | 99.98 | 0.61 |
| SAMN09095588   | human-related | human-related | Homo sapiens | ABAY13015        | 2013 | South Korea    | blood                     | 2 | 2   | 858 | 99.78 | 0.61 |
| SAMEA104305363 | human-related | human-related | Homo sapiens | 4300STDY7045869  | 2016 | Thailand       | missing                   | 2 | 2   | 938 | 99.98 | 0.66 |
| SAMN04745388   | human-related | human-related | Homo sapiens | XH508            | 2014 | China          | sputum                    | 2 | 2   | 191 | 99.59 | 0.64 |
| SAMN09095522   | human-related | human-related | Homo sapiens | ABAY09003        | 2009 | South Korea    | blood                     | 2 | 2   | 191 | 99.98 | 0.61 |
| SAMN03068186   | human-related | human-related | Homo sapiens | 2011BJAB3        | 2011 | China          | sputum                    | 2 | 2   | 218 | 99.88 | 1    |
| SAMN03699770   | human-related | human-related | Homo sapiens | M3AC14-8         | 2014 | Puerto Rico    | skin                      | 2 | 2   | 218 | 99.98 | 1.27 |
| SAMN03765511   | human-related | human-related | Homo sapiens | KMDRAB15         | 2012 | Taiwan         | blood                     | 2 | 2   | 218 | 99.59 | 0.83 |
| SAMN04005089   | human-related | human-related | Homo sapiens | AbMDR-GLH5       | 2011 | Spain          | tracheobronchial aspirate | 2 | 2   | 218 | 100   | 0    |
| SAMN10716697   | human-related | human-related | Homo sapiens | RCS2             | 2015 | France         | urine                     | 2 | 2   | 218 | 99.59 | 0.63 |
| SAMN03068183   | human-related | human-related | Homo sapiens | 2011BJAB1        | 2011 | China          | abdominal fluid           | 2 | 2   | 368 | 99.98 | 0.63 |
| SAMN09095521   | human-related | human-related | Homo sapiens | ABAY09002        | 2009 | South Korea    | blood                     | 2 | 2   | 368 | 99.19 | 0.67 |
| SAMN03068244   | human-related | human-related | Homo sapiens | 2011GDAB4        | 2011 | China          | blood                     | 2 | 2   | 381 | 99.98 | 0.61 |
| SAMN06460861   | human-related | human-related | Homo sapiens | s228             | 2012 | China          | sputum                    | 2 | 2   | 381 | 98.92 | 0.94 |
| SAMN13066377   | human-related | human-related | Homo sapiens | AK 2015 20       | 2015 | Greece         | rectal                    | 2 | 2   | 425 | 99.98 | 0.63 |
| SAMN13066390   | human-related | human-related | Homo sapiens | TR 2016 34       | 2016 | Greece         | blood                     | 2 | 2   | 425 | 99.88 | 0.63 |
| SAMN03068199   | human-related | human-related | Homo sapiens | 2011GDAB1        | 2011 | China          | sputum                    | 2 | 2   | 457 | 99.98 | 0.63 |
| SAMN09667773   | human-related | human-related | Homo sapiens | AB4              | 2011 | Hong Kong      | missing                   | 2 | 2   | 457 | 99.98 | 1.04 |
| SAMN04376870   | human-related | human-related | Homo sapiens | 2015ZJAB3        | 2014 | China          | sputum                    | 2 | 2   | 784 | 99.98 | 0.61 |
| SAMN04745474   | human-related | human-related | Homo sapiens | XH722            | 2013 | China          | sputum                    | 2 | 2   | 784 | 97.23 | 0.61 |
| SAMEA1466079   | human-related | human-related | Homo sapiens | WM99c            | 1999 | Australia      | missing                   | 2 | 2   | 208 | 99.75 | 0.61 |
| SAMN01828175   | human-related | human-related | Homo sapiens | NIPH 2061        | 2003 | Czech Republic | I.V. Cannula              | 2 | 2   | 208 | 99.98 | 0.61 |
| SAMN02581277   | human-related | human-related | Homo sapiens | BIDMC 56         | 2013 | USA            | urine                     | 2 | 2   | 208 | 99.59 | 0.61 |
| SAMN02911269   | human-related | human-related | Homo sapiens | BJ7              | 2012 | China          | sputum                    | 2 | 2   | 208 | 99.98 | 0.63 |
| SAMN03765510   | human-related | human-related | Homo sapiens | ISAB51           | 2010 | Taiwan         | blood                     | 2 | 2   | 208 | 99.98 | 0.63 |
| SAMEA103955436 | human-related | human-related | Homo sapiens | AC13 M           | 2015 | Morocco        | anal margin               | 2 | 2   | 195 | 99.59 | 0.7  |
| SAMN04745390   | human-related | human-related | Homo sapiens | XH510            | 2014 | China          | sputum                    | 2 | 2   | 195 | 99.59 | 0.63 |
| SAMN04992847   | human-related | human-related | Homo sapiens | AB067            | 2013 | India          | missing                   | 2 | 2   | 195 | 99.59 | 0.66 |
| SAMN09223254   | human-related | human-related | Homo sapiens | GML-KP7-Col R AB | 2017 | Turkey         | endotracheal aspirate     | 2 | 2   | 195 | 99.98 | 0.63 |
| SAMN13066413   | human-related | human-related | Homo sapiens | GE 2017 62       | 2017 | Greece         | missing                   | 2 | 2   | 195 | 99.98 | 0.63 |
| SAMN01828180   | human-related | human-related | Homo sapiens | NIPH 1362        | 2000 | Czech Republic | tracheal aspirate         | 2 | 47  | 437 | 99.98 | 0.72 |
| SAMN04005085   | human-related | human-related | Homo sapiens | AbMDR-GLH1       | 2011 | Spain          | tracheobronchial aspirate | 2 | 187 | 208 | 99.92 | 0.61 |
| SAMN04005086   | human-related | human-related | Homo sapiens | AbMDR-GLH2       | 2011 | Spain          | tracheobronchial aspirate | 2 | 745 | 208 | 99.98 | 1.44 |
| SAMEA104305238 | human-related | human-related | Homo sapiens | 4300STDY7045742  | 2016 | Thailand       | missing                   | 2 | 823 | 457 | 99.98 | 0.63 |
| SAMN04745484   | human-related | human-related | Homo sapiens | XH733            | 2013 | China          | sputum                    | 2 | 880 | 208 | 99.98 | 0.62 |
| SAMN04745446   | human-related | human-related | Homo sapiens | XH685            | 2014 | China          | sputum                    | 2 | 2   | 451 | 99.98 | 0.61 |

|                |               |               |                |                    |         |                |                         |     |             |             |       |      |
|----------------|---------------|---------------|----------------|--------------------|---------|----------------|-------------------------|-----|-------------|-------------|-------|------|
| SAMN07977796   | human-related | human-related | Homo sapiens   | S18                | 2011    | USA            | BAL                     | 2   | 2           | 451         | 99.98 | 0.63 |
| SAMN09095587   | human-related | human-related | Homo sapiens   | ABAY13014          | 2013    | South Korea    | blood                   | 2   | 2           | 451         | 99.98 | 0.63 |
| SAMN10716696   | human-related | human-related | Homo sapiens   | RCS1               | 2014    | France         | distal bronchial sample | 2   | 2           | 451         | 99.98 | 0.65 |
| SAMN13066417   | human-related | human-related | Homo sapiens   | SI 2017_69         | 2017    | Greece         | broncheal fluid         | 2   | 2           | 451         | 99.94 | 0.63 |
| SAMN03078662   | human-related | human-related | Homo sapiens   | AB3560             | 2006    | USA            | blood                   | 3   | 3           | 928         | 100   | 0    |
| SAMN03078673   | human-related | human-related | Homo sapiens   | AB4456             | 2007    | USA            | trach aspirate          | 3   | 3           | 928         | 100   | 0    |
| SAMN01828181   | human-related | human-related | Homo sapiens   | NIPH 1669          | 1997    | Netherlands    | blood                   | 3   | 3           | 106         | 100   | 0    |
| SAMN09951355   | human-related | human-related | Homo sapiens   | MC75               | 2016    | Bolivia        | ulcer                   | 4   | 15          | 236         | 99.91 | 0    |
| SAMN01828174   | human-related | human-related | Homo sapiens   | NIPH 1734          | 2001    | Czech Republic | sputum                  | 4   | 15          | 950         | 100   | 0    |
| SAMN05005381   | human-related | human-related | Homo sapiens   | CU032113           | 2013    | USA            | wound                   | 5   | 79          | 124         | 100   | 2.32 |
| SAMN09951323   | human-related | human-related | Homo sapiens   | MC17               | 2016    | Bolivia        | blood                   | 5   | 79          | 233         | 99.95 | 0.87 |
| SAMN09951336   | human-related | human-related | Homo sapiens   | MC38               | 2016    | Bolivia        | urine                   | 5   | 79          | 233         | 100   | 0.87 |
| SAMN07303770   | human-related | human-related | Homo sapiens   | MCR6056            | 2015    | Honduras       | blood                   | 5   | 156         | 758         | 100   | 0.82 |
| SAMN10910651   | human-related | human-related | Homo sapiens   | A158               | 2012    | Mexico         | bronchoalveolar lavage  | 5   | 156         | 758         | 96.35 | 2.33 |
| SAMN11359847   | human-related | human-related | Homo sapiens   | Ab5038             | missing | Mexico         | missing                 | 5   | 156         | 758         | 99.73 | 0.82 |
| SAMN10341989   | human-related | human-related | Homo sapiens   | AB4332             | 2016    | Brazil         | respiratory tract       | 6   | 78          | 944         | 100   | 0    |
| SAMN12509149   | human-related | human-related | Homo sapiens   | 830                | 2018    | Georgia        | missing                 | 6   | 78          | 1104        | 100   | 0.34 |
| SAMN12509151   | human-related | human-related | Homo sapiens   | 3365               | 2018    | Georgia        | missing                 | 6   | 78          | 944         | 100   | 0.34 |
| SAMN09951331   | human-related | human-related | Homo sapiens   | MC31               | 2016    | Bolivia        | catheter                | 7   | 25          | 1489        | 100   | 0    |
| SAMN09951332   | human-related | human-related | Homo sapiens   | MC32               | 2016    | Bolivia        | ulcer                   | 7   | 25          | 1489        | 100   | 0    |
| SAMN09951348   | human-related | human-related | Homo sapiens   | MC63               | 2016    | Bolivia        | fluid (bone tissue)     | 7   | 25          | 1519        | 99.86 | 0    |
| SAMN09951349   | human-related | human-related | Homo sapiens   | MC64               | 2016    | Bolivia        | urine                   | 7   | 25          | 1519        | 99.59 | 0    |
| SAMN09951351   | human-related | human-related | Homo sapiens   | MC71               | 2016    | Bolivia        | exudate (leg)           | 7   | 25          | 1528        | 99.73 | 0    |
| SAMN09951357   | human-related | human-related | Homo sapiens   | MC77               | 2016    | Bolivia        | tracheal secretion      | 7   | 25          | 1528        | 100   | 0    |
| SAMN09951337   | human-related | human-related | Homo sapiens   | MC39               | 2016    | Bolivia        | urine                   | 7   | 25          | 1529        | 99.32 | 0    |
| SAMN09951342   | human-related | human-related | Homo sapiens   | MC51               | 2016    | Bolivia        | lumbosacral ulcer       | 7   | 25          | 1529        | 100   | 0    |
| SAMN07303765   | human-related | human-related | Homo sapiens   | HEU3               | 2016    | Honduras       | cornea secretion        | 7   | 25          | 1588        | 99.91 | 0    |
| SAMN12771933   | human-related | human-related | Homo sapiens   | AMA42              | 2017    | missing        | missing                 | 7   | 25          | 690         | 100   | 0.41 |
| SAMN03078660   | human-related | human-related | Homo sapiens   | AB2828             | 2006    | USA            | blood                   | 7   | 25          | 993         | 100   | 0.55 |
| SAMN03078663   | human-related | human-related | Homo sapiens   | AB3638             | 2007    | USA            | severe trauma site      | 7   | 25          | 993         | 100   | 0.41 |
| SAMN07303776   | human-related | human-related | Homo sapiens   | MCR10179           | 2015    | Honduras       | endobronchial tube      | 7   | 25          | 229         | 100   | 0    |
| SAMN12771919   | human-related | human-related | Homo sapiens   | AMA3               | 2015    | missing        | missing                 | 7   | 25          | 229         | 100   | 0.41 |
| SAMN09951315   | human-related | human-related | Homo sapiens   | MC1                | 2015    | Bolivia        | catheter                | 7   | 991         | 1518        | 100   | 0.02 |
| SAMN09951343   | human-related | human-related | Homo sapiens   | MC53               | 2016    | Bolivia        | wound                   | 7   | 991         | 1518        | 99    | 0    |
| SAMEA104305191 | human-related | human-related | Homo sapiens   | 4300STDY7045695    | 2016    | Thailand       | missing                 | 8   | 10          | 447         | 100   | 0.14 |
| SAMN01828149   | human-related | human-related | Homo sapiens   | NIPH 335           | 1994    | Czech Republic | sputum                  | 8   | 10          | 447         | 100   | 0.27 |
| SAMN02628531   | human-related | human-related | Homo sapiens   | LAC-4              | 1997    | USA            | missing                 | 8   | 10          | 447         | 100   | 0.27 |
| SAMN03068269   | human-related | human-related | Homo sapiens   | 2011ZJAB4          | 2011    | China          | blood                   | 8   | 10          | 447         | 100   | 0    |
| SAMN07303773   | human-related | human-related | Homo sapiens   | MCR9238            | 2015    | Honduras       | wound                   | 8   | 10          | 447         | 100   | 0.21 |
| SAMN09095600   | human-related | human-related | Homo sapiens   | ABAY14008          | 2014    | South Korea    | blood                   | 8   | 10          | 447         | 100   | 0    |
| SAMN12605424   | human-related | human-related | Homo sapiens   | TVGH-612           | 2002    | Taiwan         | blood                   | 8   | 10          | 447         | 99.73 | 0.41 |
| SAMEA104305269 | human-related | human-related | Homo sapiens   | 4300STDY7045774    | 2016    | Thailand       | missing                 | 8   | 10          | 585         | 100   | 0.27 |
| SAMN03080633   | human-related | human-related | Homo sapiens   | T214               | 2010    | Thailand       | missing                 | 8   | 10          | 585         | 99.91 | 0.55 |
| SAMN03068270   | human-related | human-related | Homo sapiens   | 2004ZJAB5          | 2004    | China          | sputum                  | 8   | 23          | 642         | 100   | 0    |
| SAMN04745444   | human-related | human-related | Homo sapiens   | XH683              | 2012    | China          | sputum                  | 8   | 23          | 642         | 99.98 | 0.68 |
| SAMN08093368   | human-related | human-related | Homo sapiens   | ZQ9                | 2016    | Iraq           | blood                   | 8   | 575         | 582         | 100   | 0.05 |
| SAMN08093369   | human-related | human-related | Homo sapiens   | ZQ10               | 2016    | Iraq           | cerebrospinal fluid     | 8   | 575         | 582         | 100   | 0.05 |
| SAMN16304032   | animal origin | livestock     | Sus scrofa dom | Res13-Abat-PEA21-1 | 2018    | Canada         | swab                    | --- | Undetermine | Undetermine | 100   | 0    |
| SAMN10662617   | animal origin | livestock     | Sus scrofa dom | AB18PR065          | 2018    | China          | feces                   | --- | 1303        | 1929        | 100   | 0    |
| SAMN16304042   | animal origin | livestock     | Sus scrofa dom | Res13-Abat-PEA28-1 | 2018    | Canada         | swab                    | --- | 375         | Undetermine | 100   | 0    |
| SAMN16304041   | animal origin | livestock     | Sus scrofa dom | Res13-Abat-PEA25-1 | 2018    | Canada         | swab                    | --- | Undetermine | Undetermine | 100   | 0    |
| SAMN16304029   | animal origin | livestock     | Sus scrofa dom | Res13-Abat-PEA16-1 | 2018    | Canada         | swab                    | --- | Undetermine | Undetermine | 100   | 0    |



|              |               |           |                  |                   |           |                |                |    |             |             |     |      |
|--------------|---------------|-----------|------------------|-------------------|-----------|----------------|----------------|----|-------------|-------------|-----|------|
| SAMN16304027 | animal origin | livestock | Sus scrofa dom   | Res13-Abat-EA3-S5 | 2018      | Canada         | swab           | -- | Undetermine | Undetermine | 100 | 0    |
| SAMN15105067 | animal origin | livestock | Sus scrofa       | KCJK8630          | 2018      | USA            | feces          | -- | Undetermine | Undetermine | 100 | 0.05 |
| SAMN15105068 | animal origin | livestock | Sus scrofa       | KCJK8620          | 2018      | USA            | feces          | -- | Undetermine | Undetermine | 100 | 0    |
| SAMN27298904 | animal origin | livestock | Sus scrofa dom   | PF07              | 2006/2007 | United Kingdom | faecal sample  | -- | 162         | 235         | 100 | 0.07 |
| SAMN27298905 | animal origin | livestock | Sus scrofa dom   | PF16              | 2006/2007 | United Kingdom | faecal sample  | -- | 162         | 235         | 100 | 0    |
| SAMN27298906 | animal origin | livestock | Sus scrofa dom   | PF18              | 2006/2007 | United Kingdom | faecal sample  | -- | 162         | 235         | 100 | 0    |
| SAMN27298907 | animal origin | livestock | Sus scrofa dom   | PF19              | 2006/2007 | United Kingdom | faecal sample  | -- | 162         | 235         | 100 | 0    |
| SAMN27298908 | animal origin | livestock | Sus scrofa dom   | PF20              | 2006/2007 | United Kingdom | faecal sample  | -- | 162         | 235         | 100 | 0    |
| SAMN27298909 | animal origin | livestock | Sus scrofa dom   | PF34              | 2006/2007 | United Kingdom | faecal sample  | -- | 162         | 235         | 100 | 0    |
| SAMN27298910 | animal origin | livestock | Sus scrofa dom   | PF36              | 2006/2007 | United Kingdom | faecal sample  | -- | 162         | 235         | 100 | 0    |
| SAMN10784980 | animal origin | livestock | Bos taurus       | C3T1-2            | 2014      | Canada         | manure         | -- | 241         | 951         | 100 | 0    |
| SAMN10784976 | animal origin | livestock | Bos taurus       | C1T1-1            | 2014      | Canada         | manure         | -- | Undetermine | Undetermine | 100 | 0.55 |
| SAMN10784979 | animal origin | livestock | Bos taurus       | C1T1-3            | 2014      | Canada         | manure         | -- | Undetermine | Undetermine | 100 | 0.55 |
| SAMN10784978 | animal origin | livestock | Bos taurus       | C1T1-2_b          | 2014      | Canada         | manure         | -- | Undetermine | Undetermine | 100 | 0.55 |
| SAMN04099660 | animal origin | livestock | Bos taurus       | TTU2014-131AME    | 2014      | USA            | feces          | -- | 742         | 1133        | 100 | 0    |
| SAMN20477964 | animal origin | poultry   | Gallus gallus dc | LHC22-2           | 2020      | China          | feces          | -- | Undetermine | Undetermine | 100 | 0.48 |
| SAMN27298896 | animal origin | livestock | Bos taurus       | CF233             | 2006/2007 | United Kingdom | faecal sample  | -- | 1014        | Undetermine | 100 | 0.55 |
| SAMN27298897 | animal origin | livestock | Bos taurus       | CF234             | 2006/2007 | United Kingdom | faecal sample  | -- | 1014        | Undetermine | 100 | 0.55 |
| SAMN27298898 | animal origin | livestock | Bos taurus       | CF251             | 2006/2007 | United Kingdom | faecal sample  | -- | 492         | Undetermine | 100 | 0.14 |
| SAMN27298899 | animal origin | livestock | Bos taurus       | CF254             | 2006/2007 | United Kingdom | faecal sample  | -- | 492         | Undetermine | 100 | 0.14 |
| SAMN27298900 | animal origin | livestock | Bos taurus       | CF258             | 2006/2007 | United Kingdom | faecal sample  | -- | 492         | Undetermine | 100 | 0.14 |
| SAMN27298901 | animal origin | livestock | Bos taurus       | CF260             | 2006/2007 | United Kingdom | faecal sample  | -- | 492         | Undetermine | 100 | 0.14 |
| SAMN27298902 | animal origin | livestock | Bos taurus       | CN26              | 2006/2007 | United Kingdom | nostril sample | -- | 492         | Undetermine | 100 | 0.14 |
| SAMN27298903 | animal origin | livestock | Bos taurus       | CN35              | 2006/2007 | United Kingdom | nostril sample | -- | 492         | Undetermine | 100 | 0.14 |
| SAMN05257112 | animal origin | poultry   | Gallus gallus dc | 65                | 2012      | Germany        | missing        | -- | 23          | 642         | 100 | 1.51 |
| SAMN07236641 | animal origin | poultry   | Gallus gallus dc | GB1-2             | 2015      | Germany        | missing        | -- | 23          | 761         | 100 | 0.41 |
